# Supplementary material for: Synthesis of renewable diesel and jet fuel range alkanes using 2-methylfuran and cyclohexanone
Source: Royal Society of Chemistry journal article supplement (doi:10.1039/d2ra01987f), 2022-01-01
Supplement: d2ra01987f1.pdf [file d2ra01987f1.pdf]

## Supplementary Information

### Synthesis of renewable diesel and jet fuel range alkanes using 2-methylfuran and cyclohexanone

Shaoying Sun, Xing Zhang, Yanqing Li, Xianzhao Shao, Jianwei Ji, Junhai Liu, Wei Wang\*, Zhizhou Li and Xiaohui Ji

Shaanxi Key Laboratory of Catalysis, School of Chemistry and Environment Science,  
Shaanxi University of Technology, Hanzhong, 723001, China

\*Corresponding authors:

Dr. Wei Wang; E-mail: wangwei@snut.edu.cn; Tel.: +86 916 2641660.

#### Table of Contents

|                                                                                                                               |    |
|-------------------------------------------------------------------------------------------------------------------------------|----|
| 1. <sup>1</sup> H NMR images of products produced by the reaction of 2-methylfuran and cyclohexanone over SR150 catalyst..... | S1 |
| 2. <sup>13</sup> C NMR spectra of 5,5'-(cyclohexane-1,1-diyl)bis(2-methylfuran) .....                                         | S2 |
| 3. Hydrodeoxygenation gas chromatogram of 5,5'-(cyclohexane-1,1-diyl) bis(2-methylfuran).....                                 | S3 |
| 4. Mass spectrum of 5,5'-(cyclohexane-1,1-diyl)bis(2-methylfuran) hydrodeoxygenation reaction.....                            | S4 |
| 5. Infrared spectra of phenolic resin carrier calcined at different temperatures.....                                         | S5 |

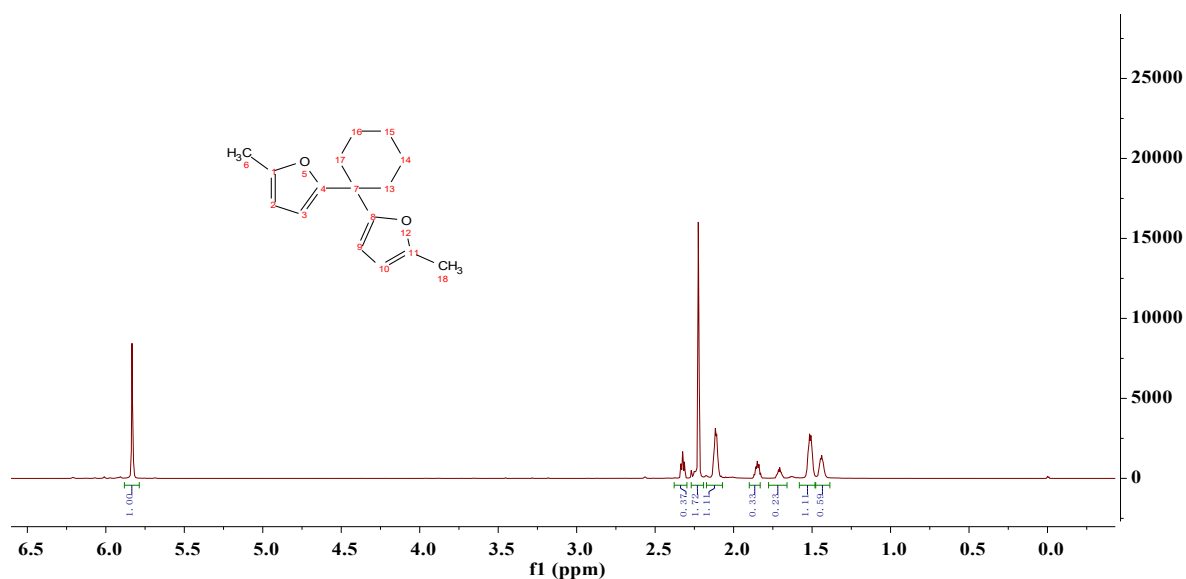

S1 5,5'-(cyclohexane-1,1-diyl)bis(2-methylfuran)  $^1\text{H}$  NMR spectrum of HAA production of 2-MF with cyclohexanone.

Synthesis of 5,5'-(cyclohexane-1,1-diyl)bis(2-methylfuran):  $^1\text{H}$  NMR ( $\text{CDCl}_3\text{-d}$ ),  $\delta$ : 5.99 (s, 2H), 5.96 (s, 2H), 2.30 (s, 6H), 2.09 (d, 4H,  $J=12$ ), 1.51 (m, 6H);

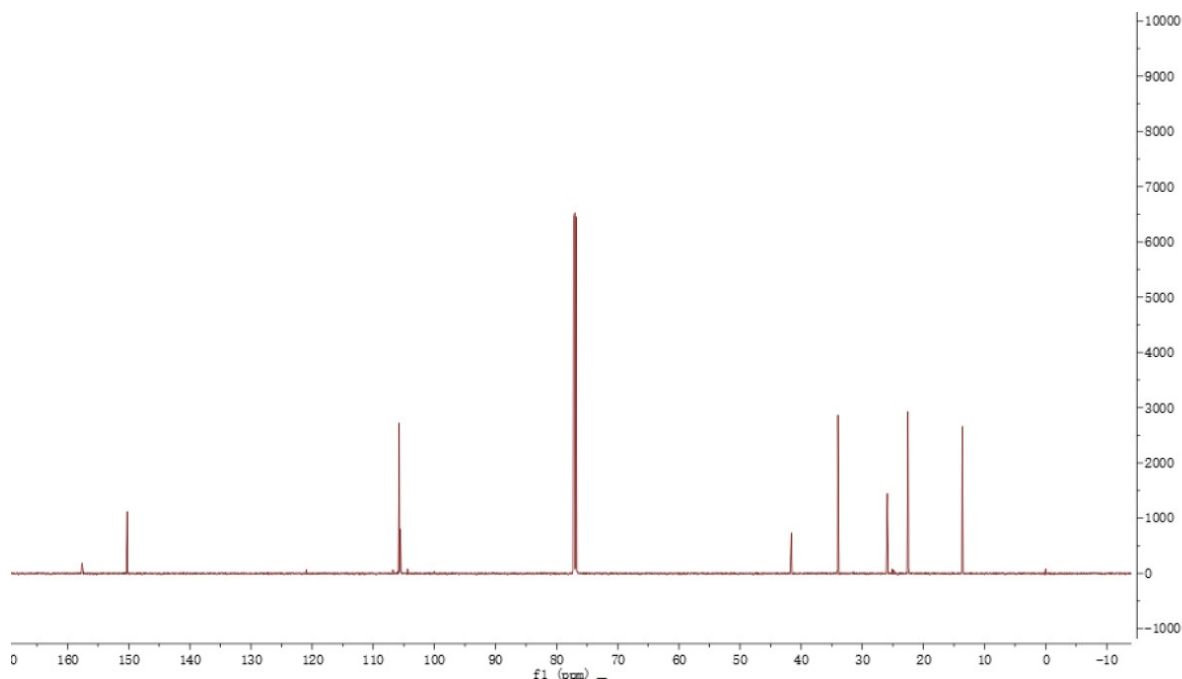

S2  $^{13}\text{C}$  NMR spectrum of 5,5'-(cyclohexane-1,1-diyl)bis(2-methylfuran) produced by HAA of 2-MF with cyclohexanone.

Synthesis of 5,5'-(cyclohexane-1,1-diyl)bis(2-methylfuran):  $^{13}\text{C}$  NMR ( $\text{CDCl}_3\text{-d}$ ),  $\delta$ : 154.8 (2C), 150 (2C), 106.2 (2C), 105.6 (2C), 45.7 (1C), 36.1 (2C), 25.1 (1C), 18 (2C), 13.7 (2C).

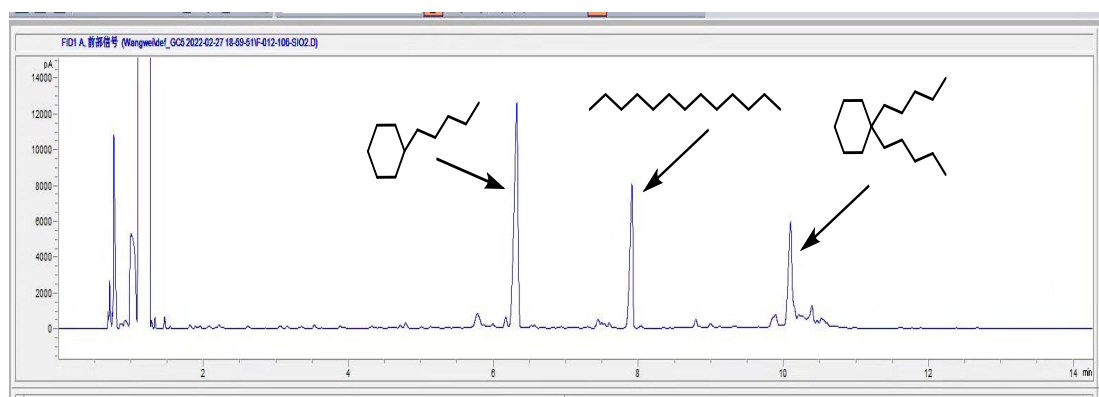

S3 Hydrodeoxygenation gas chromatogram of 5,5'-(cyclohexane-1,1-diyl)bis(2-methylfuran).

Reaction conditions: 553 K, 3.0-4.0 MPa H<sub>2</sub>, 0.20 g catalyst(SiO<sub>2</sub>), rotating speed 800 r/min. 0.50 g 5,5'-(cyclohexane-1,1-diyl)bis(2-methylfuran).

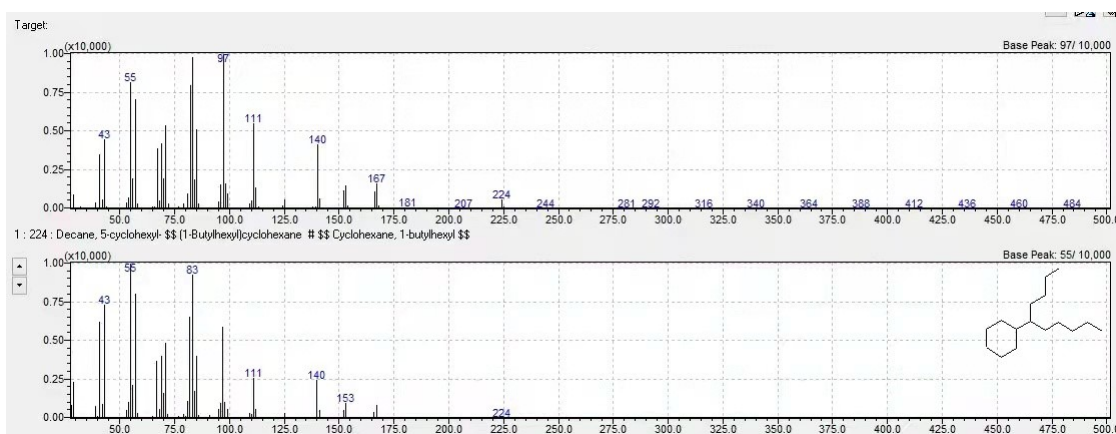

S4 Mass spectrum of 5,5'-(cyclohexane-1,1-diyl)bis(2-methylfuran) hydrodeoxygenation product.

Reaction conditions: 553 K, 3.0-4.0 MPa H<sub>2</sub>, 0.20 g catalyst, rotating speed 800 r/min. 0.50 g 5,5'-(cyclohexane-1,1-diyl)bis(2-methylfuran).

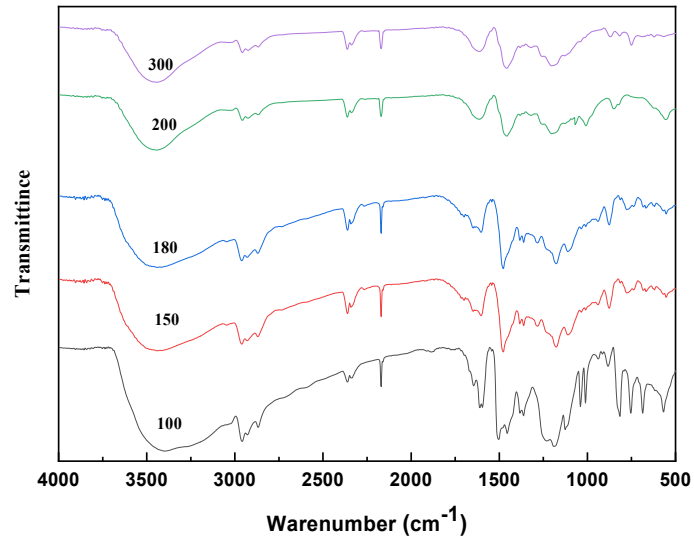

S5 Infrared spectra of phenolic resin carrier calcined at different temperatures.
